# Supplementary material for: 6-O-Nucleotidyltransferase: an aminoglycoside-modifying enzyme specific for streptomycin/streptidine
Source: Royal Society of Chemistry journal article supplement (doi:10.1039/c5md00496a), 2015-11-16
Supplement: c5md00496a1.pdf [file c5md00496a1.pdf]

**6-O-Nucleotidyltransferase: an aminoglycoside-modifying enzyme  
specific for streptomycin/streptidine**

Montserrat Latorre, Julia Revuelta, Eduardo García-Junceda,\* and Agatha Bastida\*

CSIC. Department of Bioorganic Chemistry, c/ Juan de la Cierva, 3. 28006-Madrid. Spain. Fax:  
(+) 34-915 644 853

**Figure S1.** Left; SDS-PAGE for the expression and purification of the ANT(6). Molecular weight markers (kDa), CFE of *E. coli* BL21(DE3) cells harbouring the pET-*aadk* plasmid; and NHis<sub>6</sub>-tag ANT(6) purified. Right; Line 1, 2 ANT(6) $\Delta$ His and line 3 ANT(6) purified

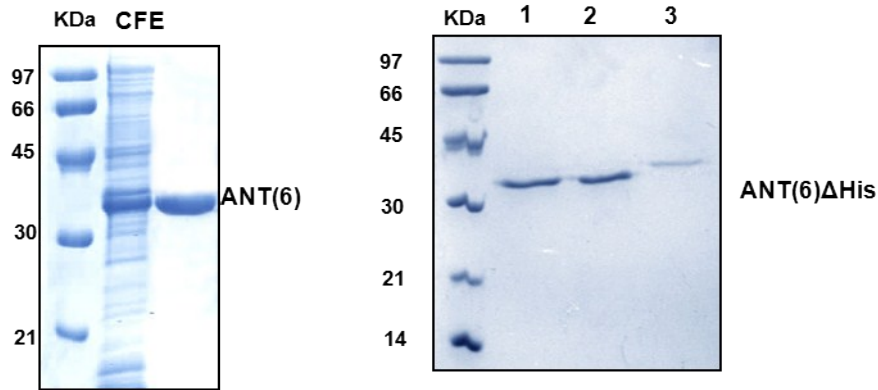

**Figure S2.-** Sedimentation equilibrium analysis to different concentration of MgCl<sub>2</sub> of the; a) ANT(6) with 0, 2.5 20mM MgCl<sub>2</sub> and b) ANT(6) $\Delta$ His with 0, 2.5mM MgCl<sub>2</sub> Mw; Apparent Molecular weight, Mw<sub>0</sub>=Molecular weight of the monomer.

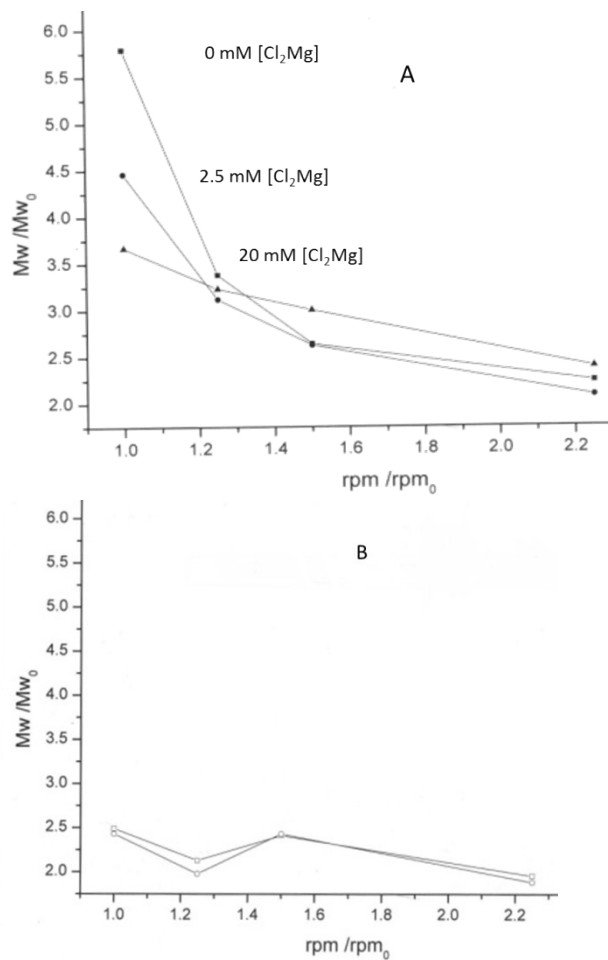

**Figura S3.** Effect of the pH on the activity of the ANT(6) enzyme.

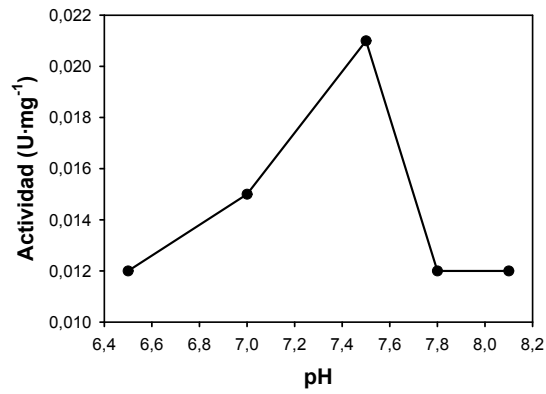

**Figure S4.-**Activity of the ANT(6) at different concentration of a) Streptomycin (ST) and b) adenosine-5'-triphosphate (ATP).

a)

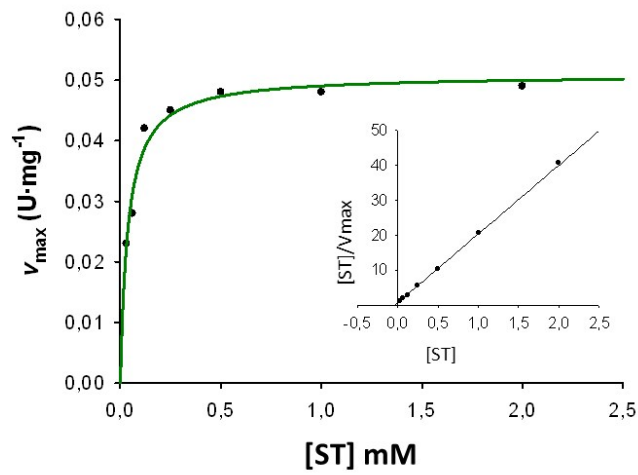

b)

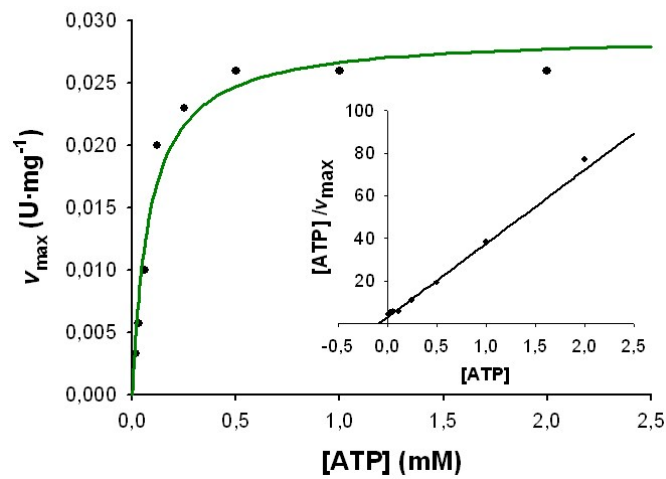

**Figure S5.-** Characterization of the AMP-Streptidine product.

$^1\text{H-NMR}$  ( $\text{D}_2\text{O}$  at 500MHz, pH=3.0)  $\delta$  = 1.06 (t, 1H, J =7.1Hz),3.45(m,5H),3.90(dd,1H,J =9.3,18.8Hz),4.09 (m, 1H), 4.18 (d, 1H, J = 1.6 Hz), 4.27 (m, 1H), 4.31 (s, 1H), 4.39 (t, 1H,J =4.56 Hz), 4.45 (t, 1H, J = 5.4 Hz), 6.07 (d, 1H,J = 5.2 Hz), 8.34 (d, 1H,J = 4.5 Hz), 8.52 (t, 1H, J =5.7Hz);

$^{13}\text{C-NMR}$  ( $\text{D}_2\text{O}$  at 125Hz)  $\delta$  = 15.3, 58.2, 59.0, 65.5, 70.2, 70.6, 71.6, 74.3, 77.1, 84.3, 88.2, 145.3,158.0, 158.3.

$^1\text{H-NMR}$  ( $\text{D}_2\text{O}$  at 500MHz, pH=3.0)

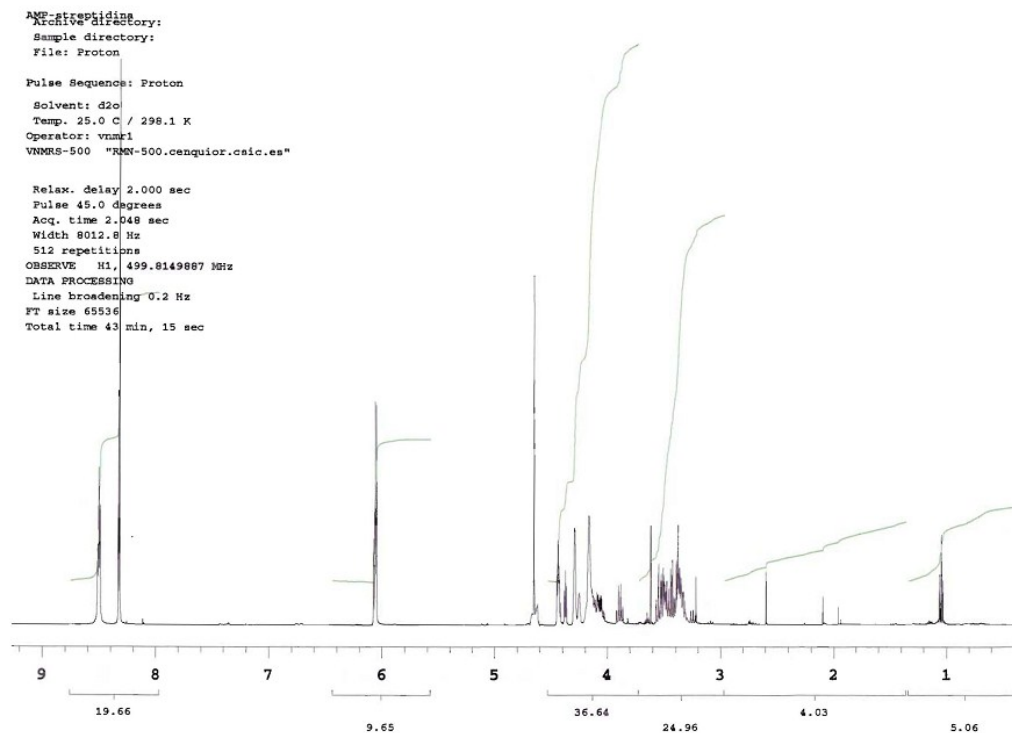

$^{13}\text{C-NMR}$  ( $\text{D}_2\text{O}$  at 125Hz)

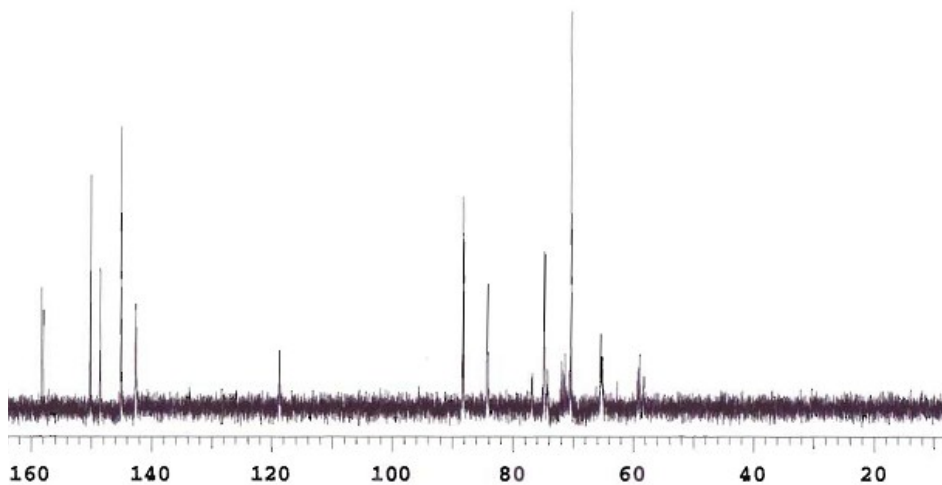

MS (ES+) m/z (%): 592.2 [M + H]<sup>+</sup>

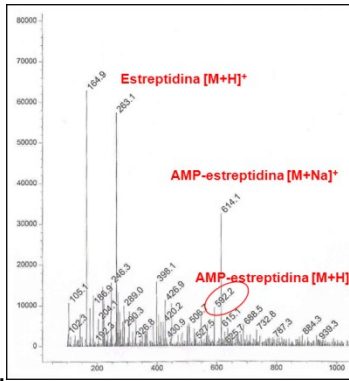

HPLC chromatogram of the AMP-streptidine.

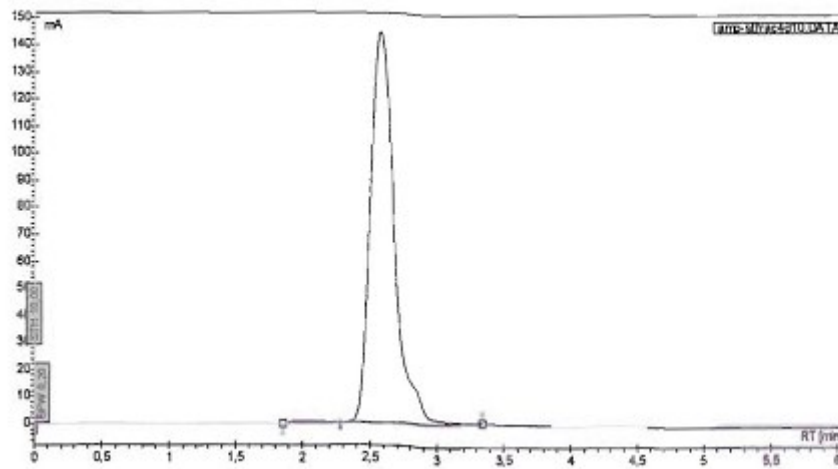

Michaelis-Menten

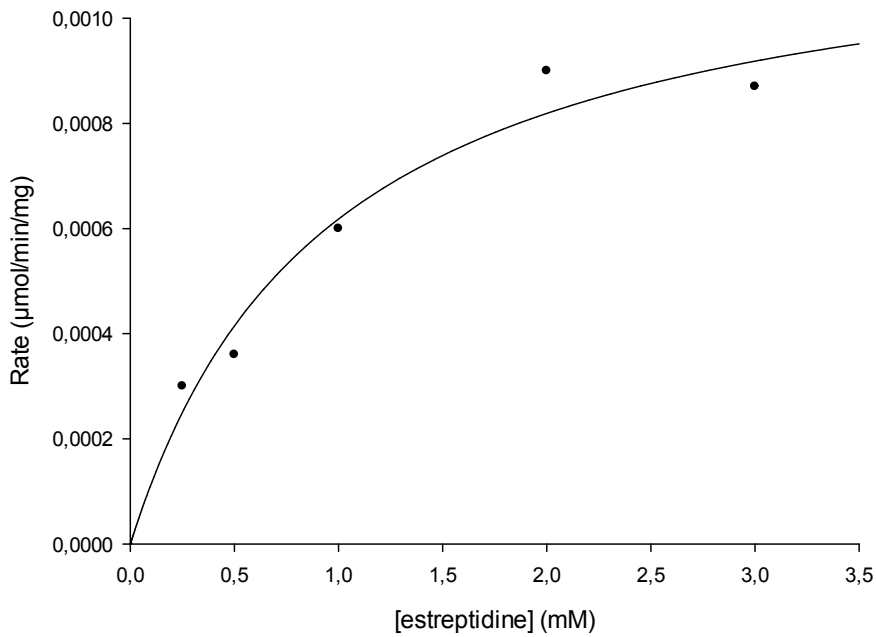

Activity of the ANT(6) at different concentration of Streptidine

**Table S1.** Activity *in vitro* of the ANT(6) with different aminoglycosides.

| <b>Aminoglycoside</b> | <b>Activity</b><br>(U·mg <sup>-1</sup> ) |
|-----------------------|------------------------------------------|
| Streptomycin          | 0.06                                     |
| Streptidine           | 6 · 10 <sup>-4</sup>                     |
| Neomicine B           | 0.3 · 10 <sup>-4</sup>                   |
| Neamine               | 0.2 · 10 <sup>-4</sup>                   |
| Spectinomycin         | 0                                        |
| Kanamycin             | 0                                        |
| Paromomycin           | 0                                        |
| Ribostamycin          | 0                                        |

**Table S2.** Activity *in vitro* of the ANT(6) with different nucleotides.

| <b>Nucleotides<sup>[a]</sup></b> | <b>Activity</b><br>(U·mg <sup>-1</sup> ) |
|----------------------------------|------------------------------------------|
| ATP                              | 0.018                                    |
| GTP                              | 0.010                                    |
| UTP                              | 3 · 10 <sup>-4</sup>                     |
| CTP                              | 36 · 10 <sup>-4</sup>                    |
| AMPCPP                           | 0                                        |
| GDP                              | 2 · 10 <sup>-4</sup>                     |
| ADP                              | 4 · 10 <sup>-4</sup>                     |
| AMP                              | 0                                        |

<sup>[a]</sup>ATP; adenosine-5'-triphosphate, GTP: guanosine-5'-triphosphate, CTP; cytidine-5'-triphosphate UTP; uridine-5'-triphosphate, ADP; adenosine-5'-diphosphate and AMP; adenosine-5'-monophosphate.
